# Supplementary material
Source: publisher figshare collection journal article supplement (https://karger.figshare.com/ndownloader/files/19247966)
Supplement: Supplementary file 1 [file 19247966]

## Supplementary Tables

**Suppl. Table 1** PCR primers used in this study

| Primer name            | Primer sequence (5'–3')                  | Use                                          |
|------------------------|------------------------------------------|----------------------------------------------|
| <i>VvSPL18</i> -F      | ATGGAGTGGAACCTACAGCCATCC                 | Complete ORF amplification of <i>VvSPL18</i> |
| <i>VvSPL18</i> -R      | TCATGAGGGCTCATTCTGAC                     |                                              |
| <i>VvActin</i> -F      | TACAATCCATCATGAAGTGTGATG                 | qRT-PCR of <i>VvActin</i>                    |
| <i>VvActin</i> -R      | TTAGAAGCACTTCCTGTGAACAATG                |                                              |
| <i>qSPL18</i> -F       | TTCCTCGGACTGTGCTTTCT                     | qRT-PCR of <i>VvSPL18</i>                    |
| <i>qSPL18</i> -R       | CTGGACTGATTGGCATGCTC                     |                                              |
| <i>VvSPL18</i> -Bgl II | <u>GAAGATCT</u> ATGGAGTGGAACCTACAGCCATCC | Subcellular localization of <i>VvSPL18</i>   |
| <i>VvSPL18</i> -Spe I  | <u>GGACTAGT</u> TTGAGGGCTCATTCTGAC       |                                              |

**Suppl. Table 2** Amino acid composition of VvSPL18 protein

| Name | Abbreviation | Property       | Number | Ratio/% |
|------|--------------|----------------|--------|---------|
| Ala  | A            | Hydrophobicity | 14     | 3.7%    |
| Arg  | R            | Alkalinity     | 26     | 6.9%    |
| Asn  | N            | Hydrophilie    | 20     | 5.3%    |
| Asp  | D            | Acidity        | 18     | 4.8%    |
| Cys  | C            | Hydrophilie    | 11     | 2.9%    |
| Gln  | Q            | Hydrophilie    | 20     | 5.3%    |
| Glu  | E            | Acidity        | 19     | 5.0%    |
| Gly  | G            | Hydrophilie    | 27     | 7.1%    |
| His  | H            | Alkalinity     | 15     | 4.0%    |
| Ile  | I            | Hydrophobicity | 10     | 2.6%    |
| Leu  | L            | Hydrophobicity | 32     | 8.5%    |
| Lys  | K            | Alkalinity     | 17     | 4.5%    |
| Met  | M            | Hydrophobicity | 8      | 2.1%    |
| Phe  | F            | Hydrophobicity | 18     | 4.8%    |
| Pro  | P            | Hydrophobicity | 25     | 6.6%    |
| Ser  | S            | Hydrophilie    | 46     | 12.2%   |
| Thr  | T            | Hydrophilie    | 23     | 6.1%    |
| Trp  | W            | Hydrophobicity | 4      | 1.1%    |
| Tyr  | Y            | Hydrophobicity | 5      | 1.3%    |
| Val  | V            | Hydrophobicity | 20     | 5.3%    |

**Suppl. Table 3** Classification and functional quantitative analysis of promoter components of *VvSPL18*

| <i>VvSPL18</i>             | SUM | NUM | ELEMENTS        | FUNCTIONS                                                           |
|----------------------------|-----|-----|-----------------|---------------------------------------------------------------------|
| Light-related elements     | 14  | 1   | AE-box          | part of a module for light response                                 |
|                            |     | 2   | Box I           | light responsive element                                            |
|                            |     | 3   | CATT-motif      | part of a light responsive element                                  |
|                            |     | 1   | GA-motif        | part of a light responsive element                                  |
|                            |     | 2   | GAG-motif       | part of a light responsive element                                  |
|                            |     | 1   | GATA-motif      | part of a light responsive element                                  |
|                            |     | 1   | GT1-motif       | light responsive element                                            |
|                            |     | 1   | MNF1            | light responsive element                                            |
|                            |     | 1   | Sp1             | light responsive element                                            |
|                            |     | 1   | TCCC-motif      | part of a light responsive element                                  |
| Hormone-related elements   | 2   | 1   | GARE-motif      | gibberellin-responsive element                                      |
|                            |     | 1   | TCA-element     | cis-acting element involved in salicylic acid responsiveness        |
|                            |     | 3   | ARE             | cis-acting regulatory element essential for the anaerobic induction |
| Stress-related elements    | 6   | 1   | HSE             | cis-acting element involved in heat stress responsiveness           |
|                            |     | 1   | LTR             | cis-acting element involved in low-temperature responsiveness       |
|                            |     | 1   | TC-rich repeats | cis-acting element involved in defense and stress responsiveness    |
| Tissue specific elements   | 3   | 1   | CAT-box         | cis-acting regulatory element related to meristem expression        |
|                            |     | 2   | Skn-1_motif     | cis-acting regulatory element required for endosperm expression     |
| Circadian-related elements | 3   | 3   | circadian       | cis-acting regulatory element involved in circadian control         |
